# Supplementary material for: Devonian–Mississippian collapse and core complex exhumation, and partial decoupling and partitioning of Eurekan deformation as alternatives to the Ellesmerian Orogeny in Spitsbergen
Source: Copernicus journal article supplement (doi:10.5194/se-2019-200), 2020-01-13
Supplement: Supplementary file 1 [file se-2019-200-supplement.pdf]

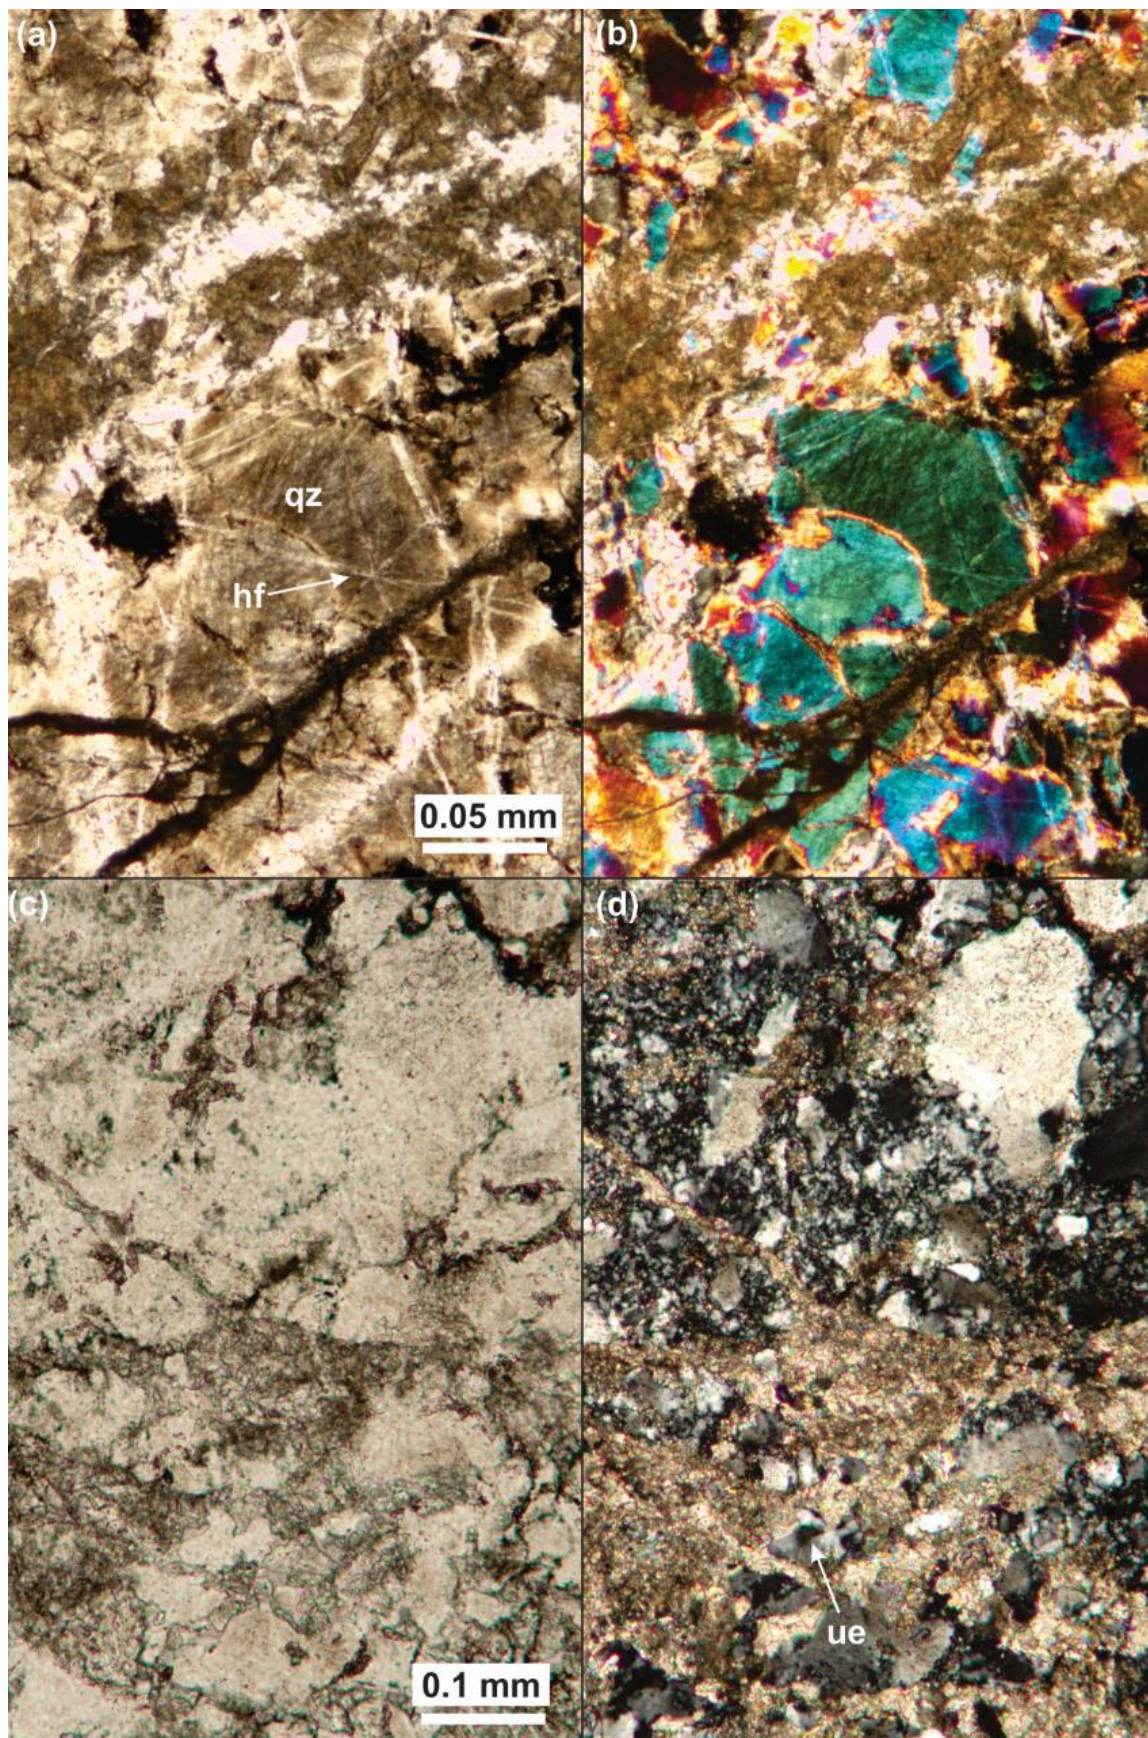

**S1:** (a) Photographs in non-polarized and (b) polarized light of a thick section in Devonian sandstone including fractured quartz (qz) crosscut by healed fractures (hf) showing no displacement and by quartz-rich cataclastic fault rock filled with calcite cement (upper part); (c) Photographs in non-polarized and (d) polarized light of cataclased Devonian sandstone comprised of quartz crystals showing mild undulose extinction (ue) and grainsize reduction along the subvertical, east-dipping fault in the gully under the coal mine in Pyramiden (Error! Reference source not found.b). Brittle cracks incorporate clasts of quartz, and a matrix of quartz, calcite and brownish, iron-rich clay minerals.



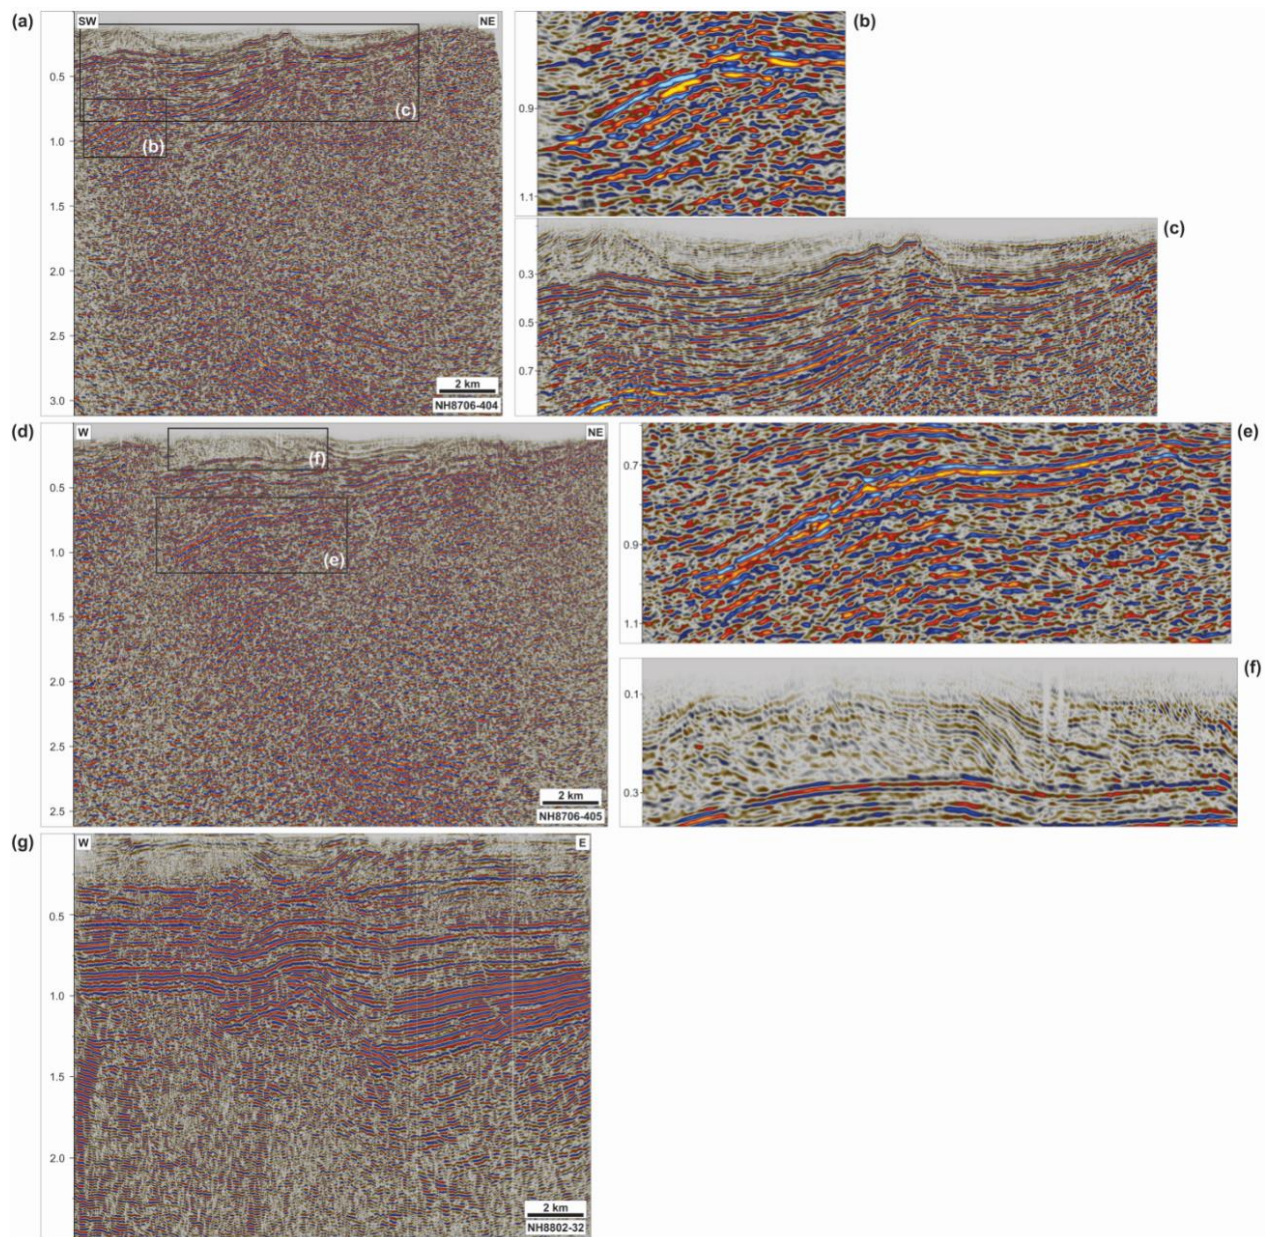

**S2**: Uninterpreted seismic sections in Sassenfjorden–Tempelfjorden (a and b) and Reindalspasset (c). See Error! Reference source not found.b for location.



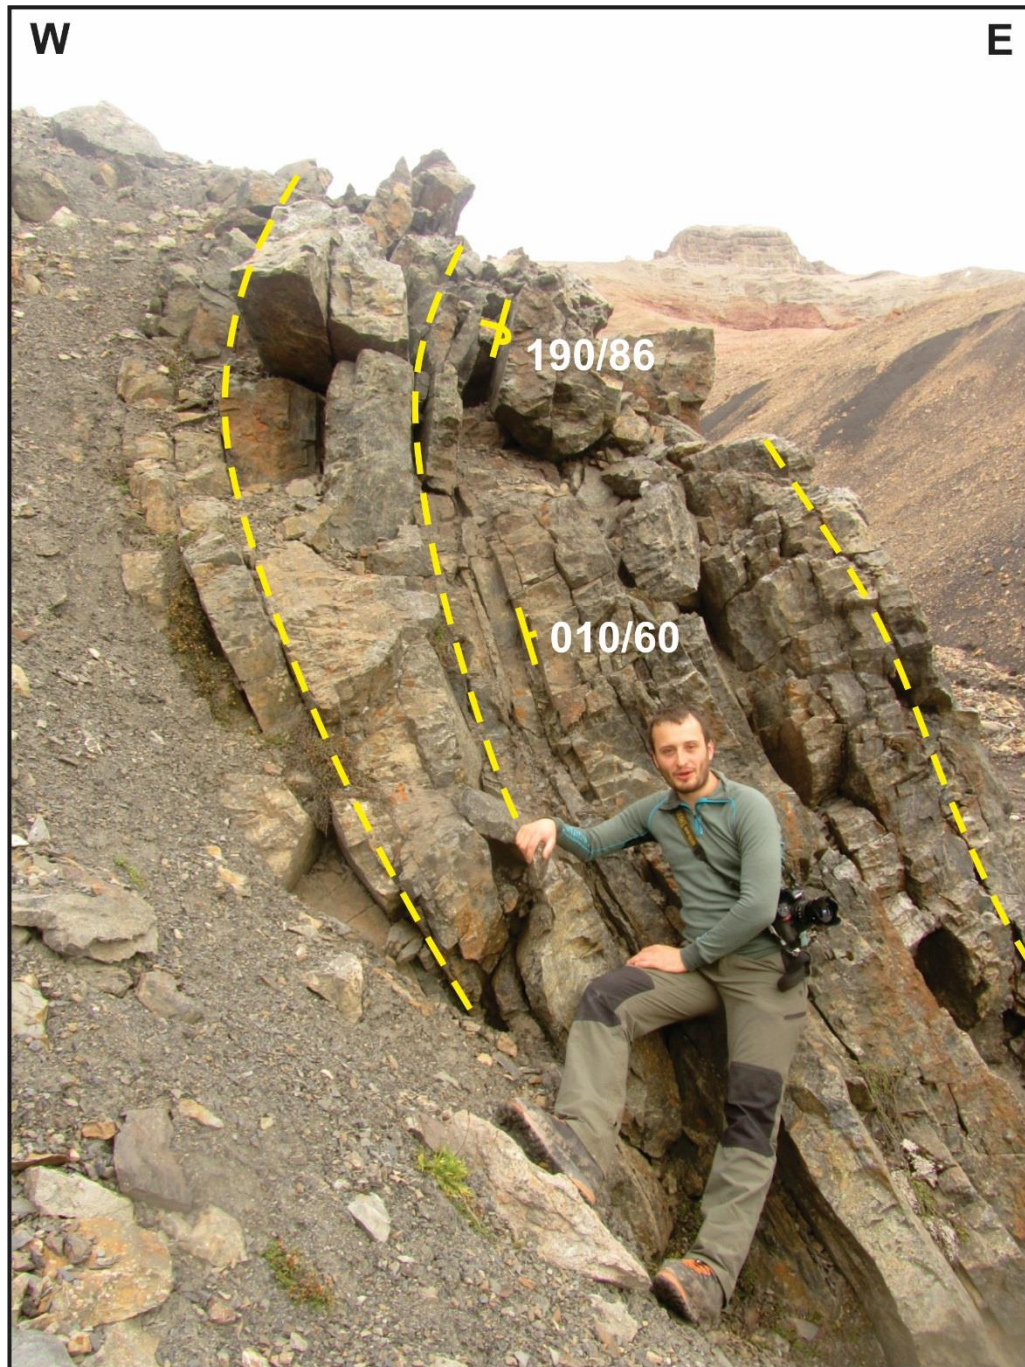

**S3**: Field photograph of steeply east-dipping, partly overturned Lower Devonian dark sandstone near the bottom of the gully below the mine entrance.
